# Supplementary material for: Total synthesis of (±)-decursivine via BINOL-phosphoric acid catalyzed tandem oxidative cyclization
Source: PubMed Central journal article supplement (PMC8497573; doi:10.1038/s41598-021-99064-8), 2021-10-07
Supplement: 41598_2021_99064_MOESM1_ESM.pdf [file 41598_2021_99064_MOESM1_ESM.pdf]

## Supporting Information

### Total Synthesis of (±)-Decursivine via BINOL-Phosphoric Acid Catalyzed Tandem Oxidative Cyclization

Prakash T. Parvatkar,<sup>1</sup> Eugene Smotkin,<sup>1</sup> Roman Manetsch<sup>\*,1,2</sup>

<sup>1</sup>Department of Chemistry and Chemical Biology, Northeastern University, 102 Hurtig Hall, 360 Huntington Avenue, Boston, MA 02115, United States.

<sup>2</sup>Department of Pharmaceutical Sciences, Northeastern University, 102 Hurtig Hall, 360 Huntington Avenue, Boston, MA 02115, United States.

E-mail: [r.manetsch@northeastern.edu](mailto:r.manetsch@northeastern.edu)

Fax: +1-6173738795

Phone: +1-6173736316

### <sup>1</sup>H and <sup>13</sup>C NMR Spectra

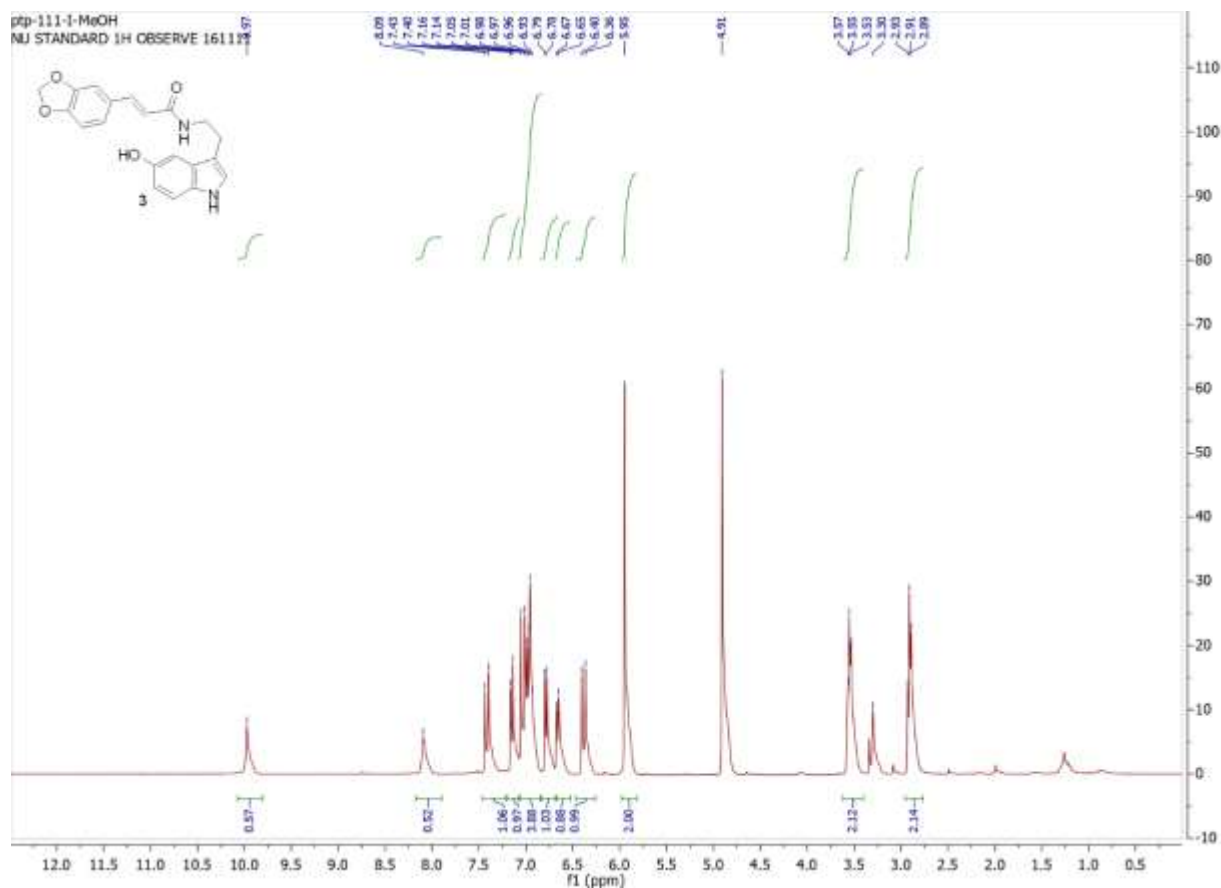

Figure S1: <sup>1</sup>H NMR spectrum of Compound 3.

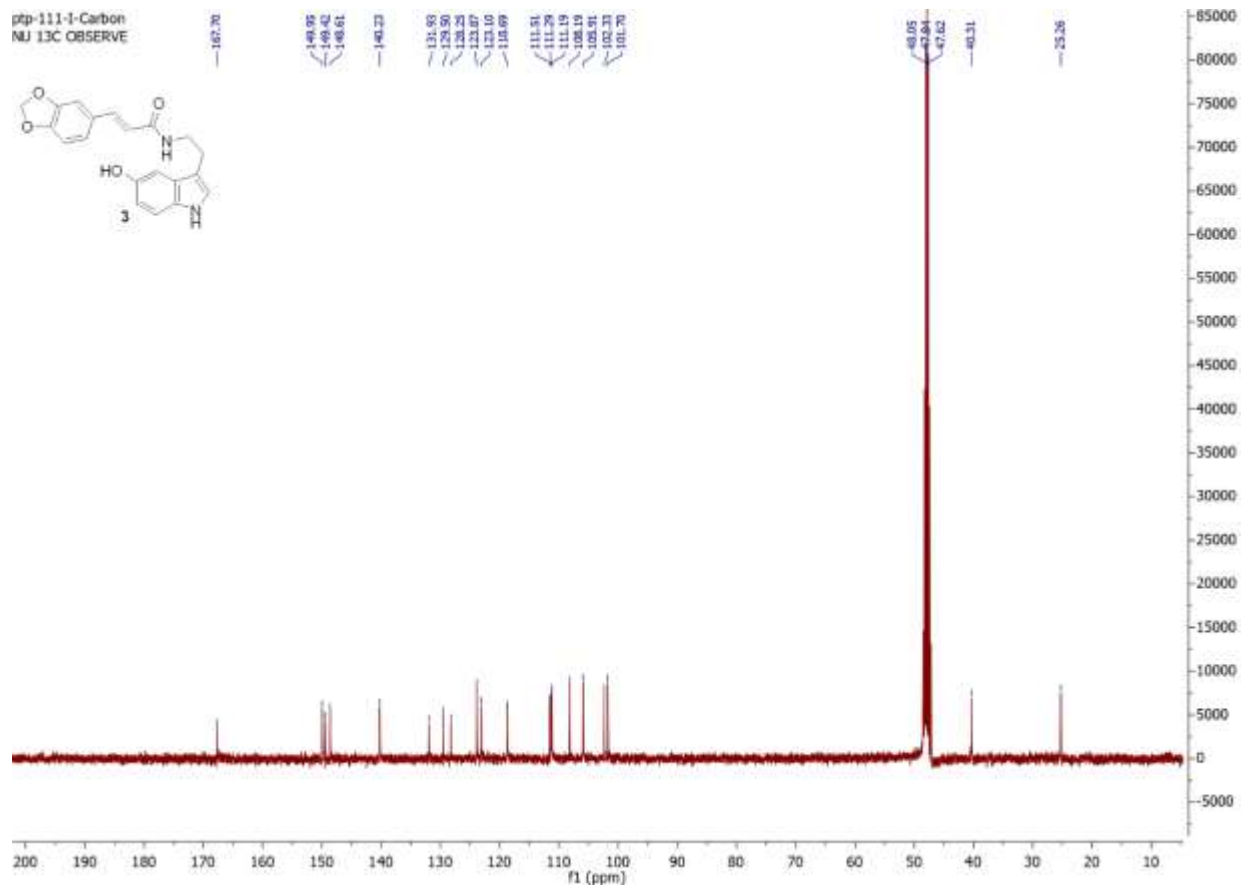

Figure S2:  $^{13}\text{C}$  NMR spectrum of Compound 3.

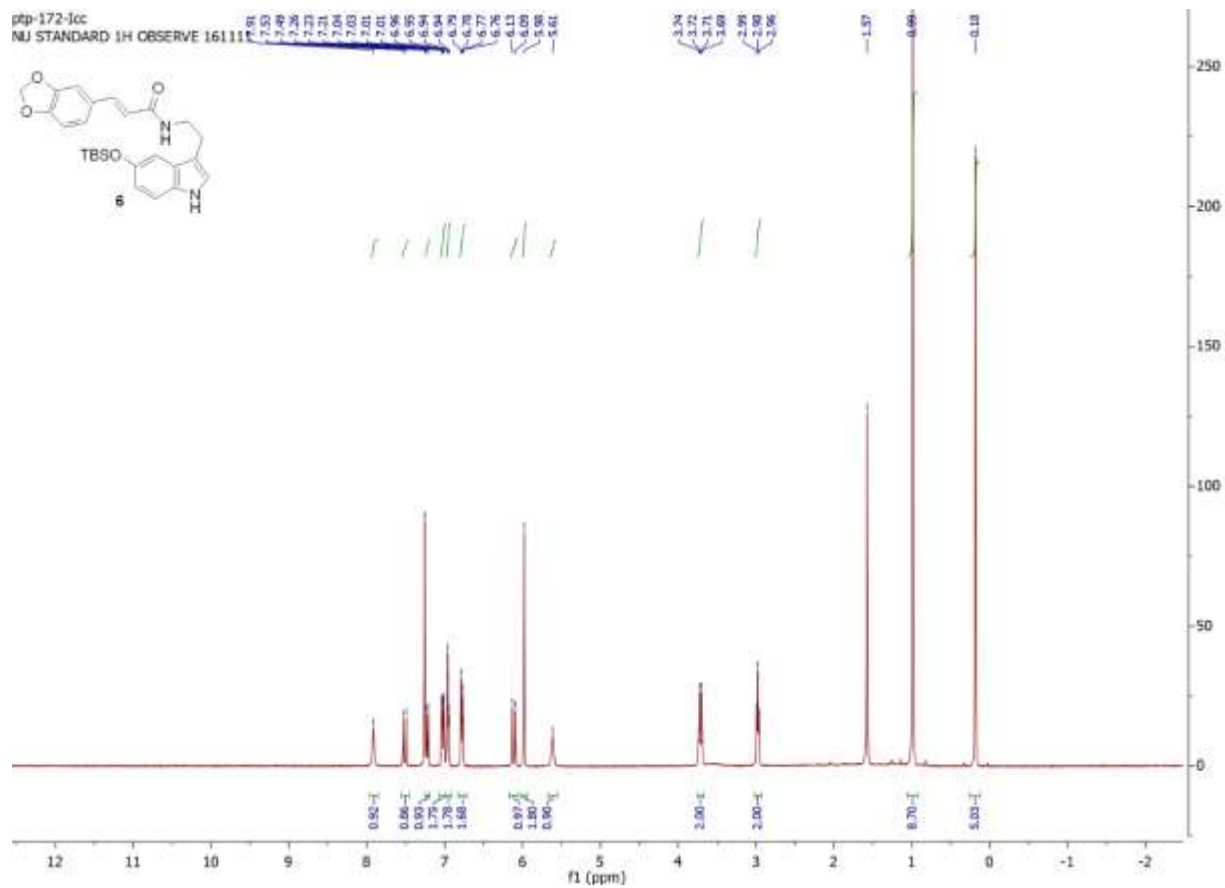

Figure S3: <sup>1</sup>H NMR spectrum of Compound 6.

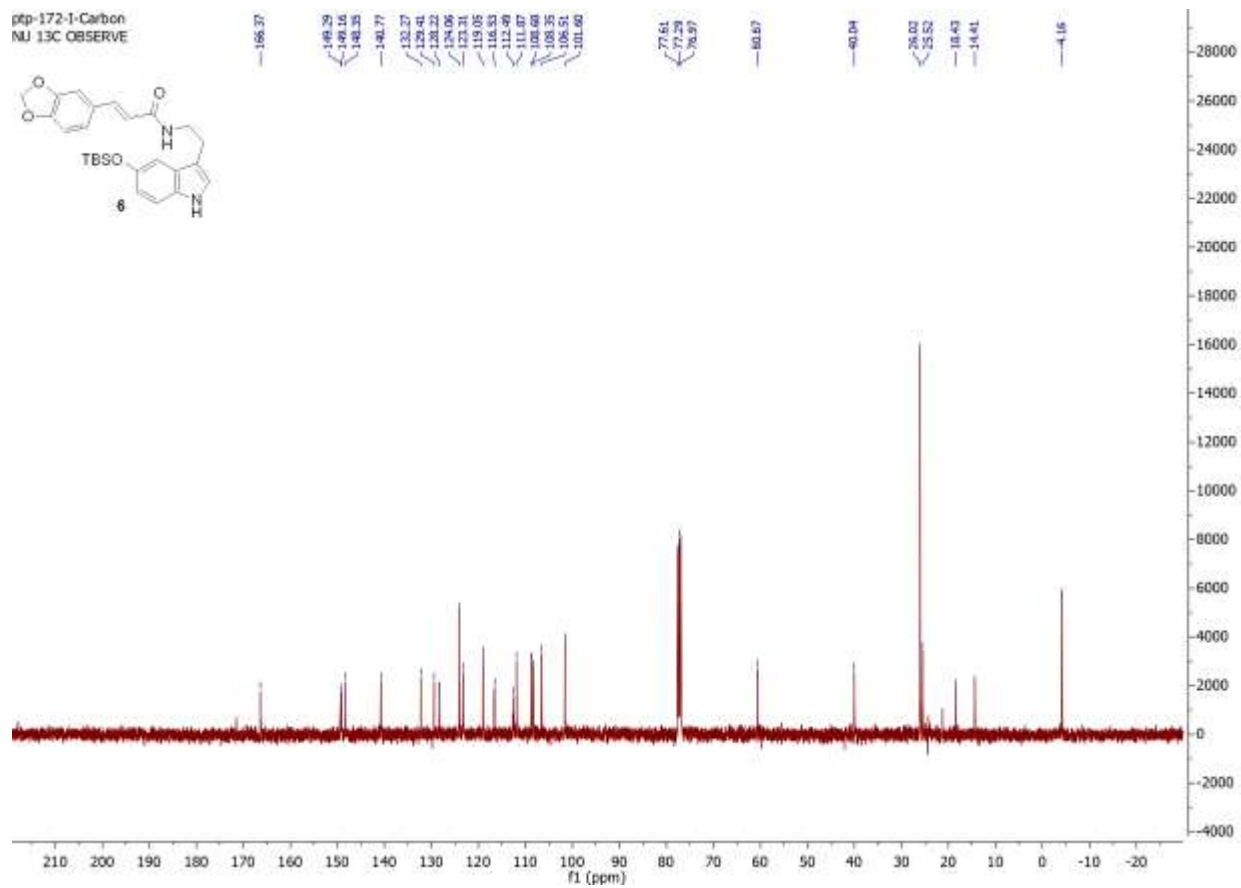

Figure S4:  $^{13}\text{C}$  NMR spectrum of Compound 6.

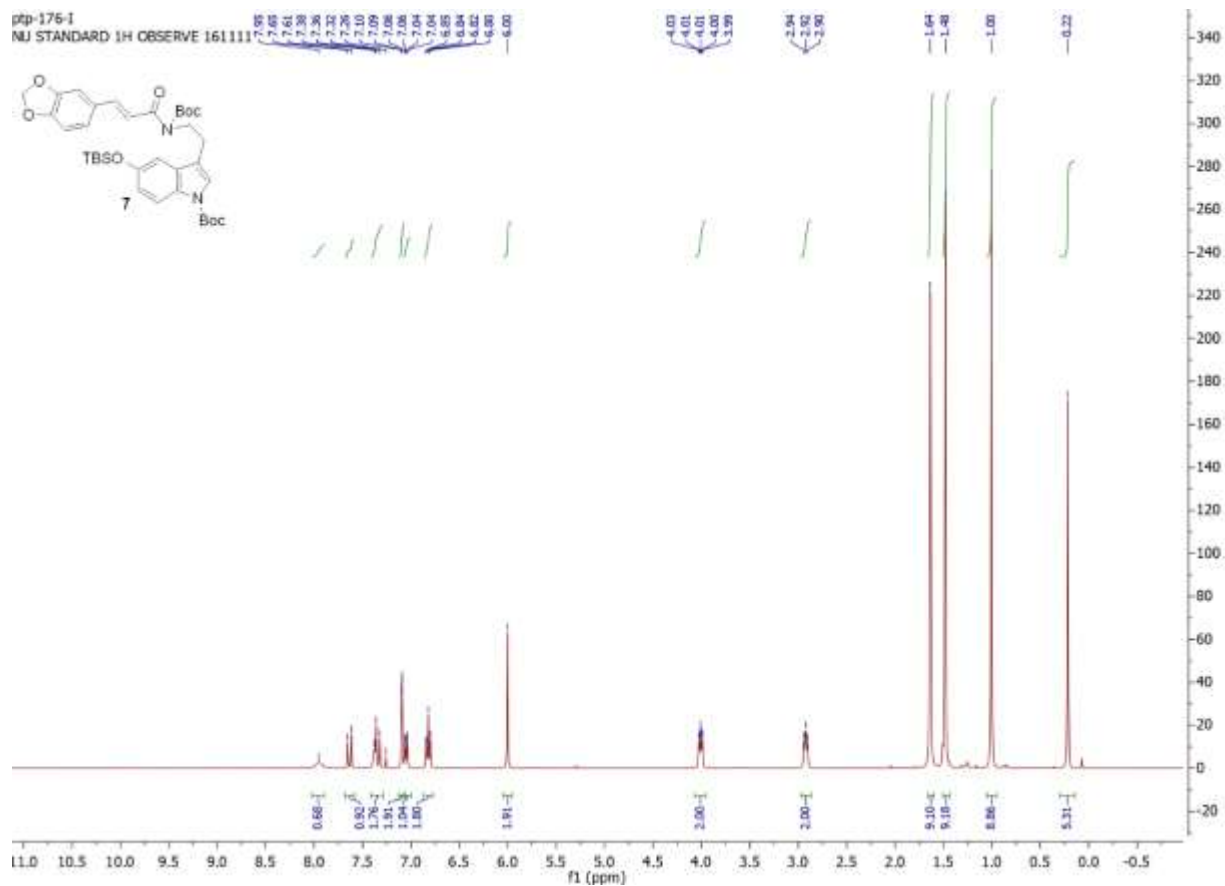

Figure S5: <sup>1</sup>H NMR spectrum of Compound 7.

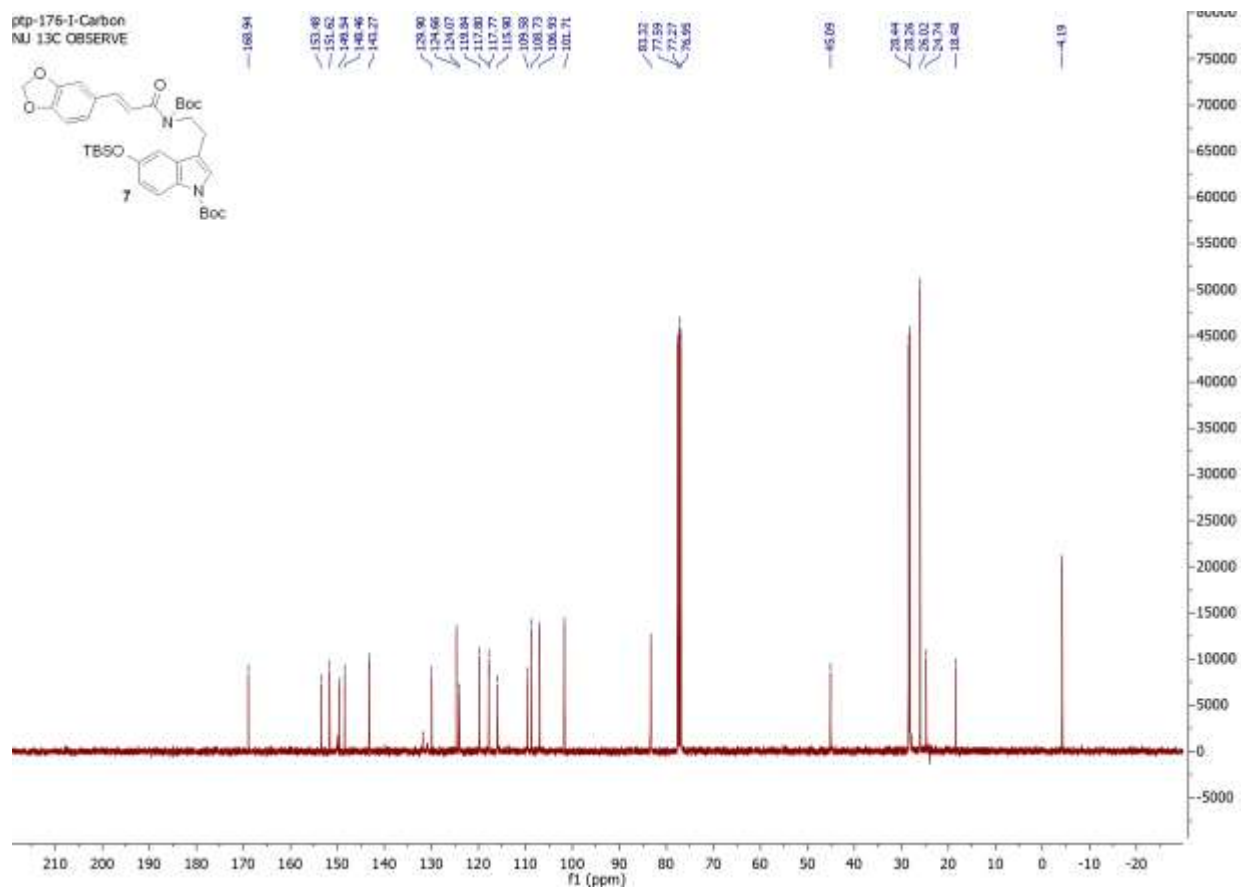

Figure S6:  $^{13}\text{C}$  NMR spectrum of Compound 7.

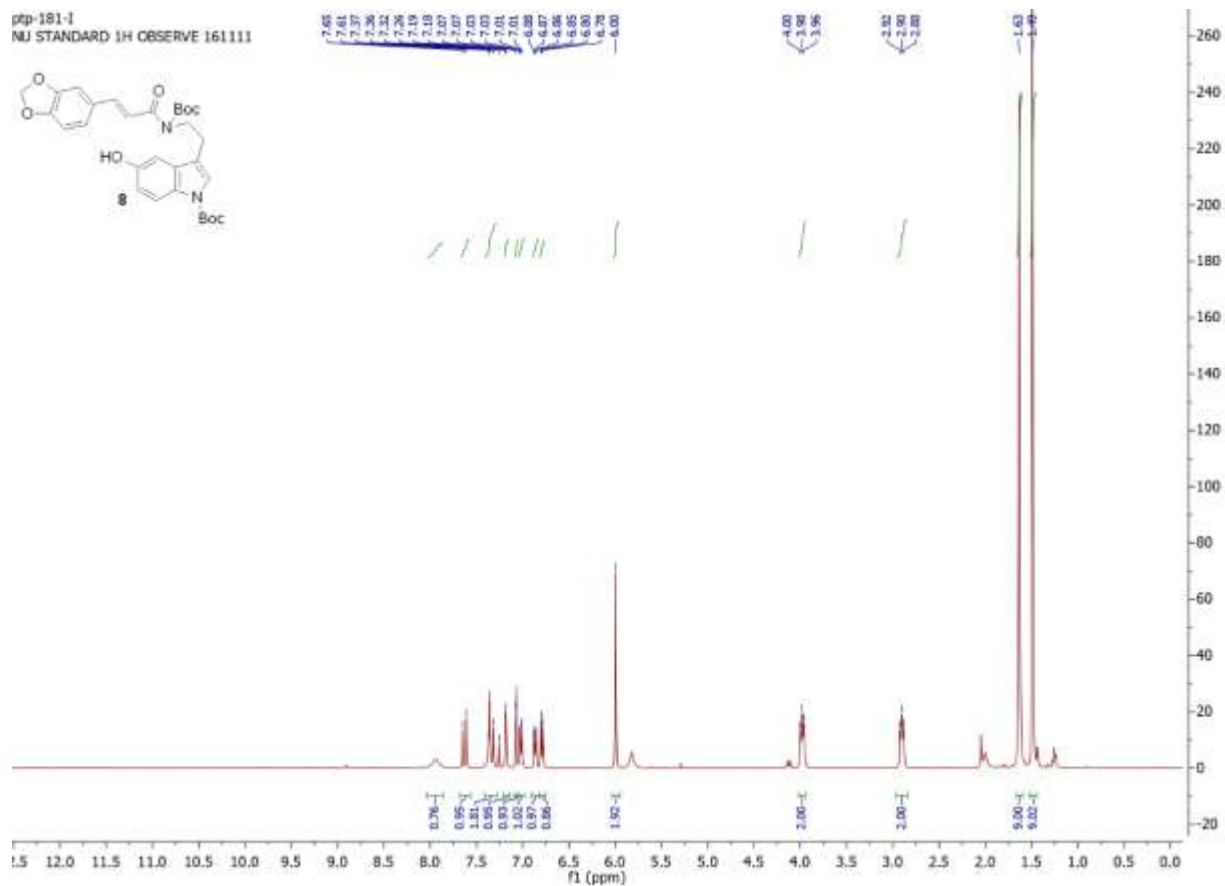

Figure S7: <sup>1</sup>H NMR spectrum of Compound 8.

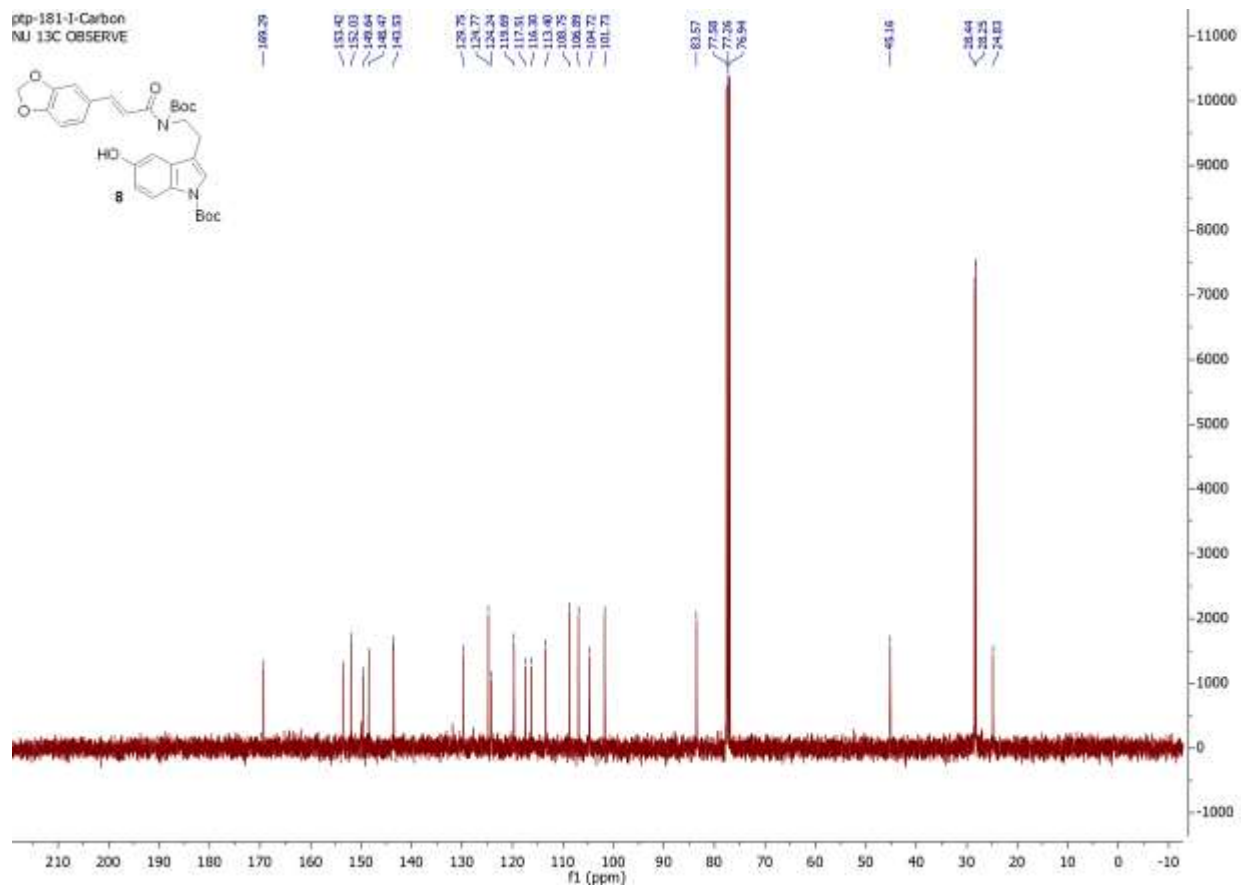

Figure S8:  $^{13}\text{C}$  NMR spectrum of Compound 8.



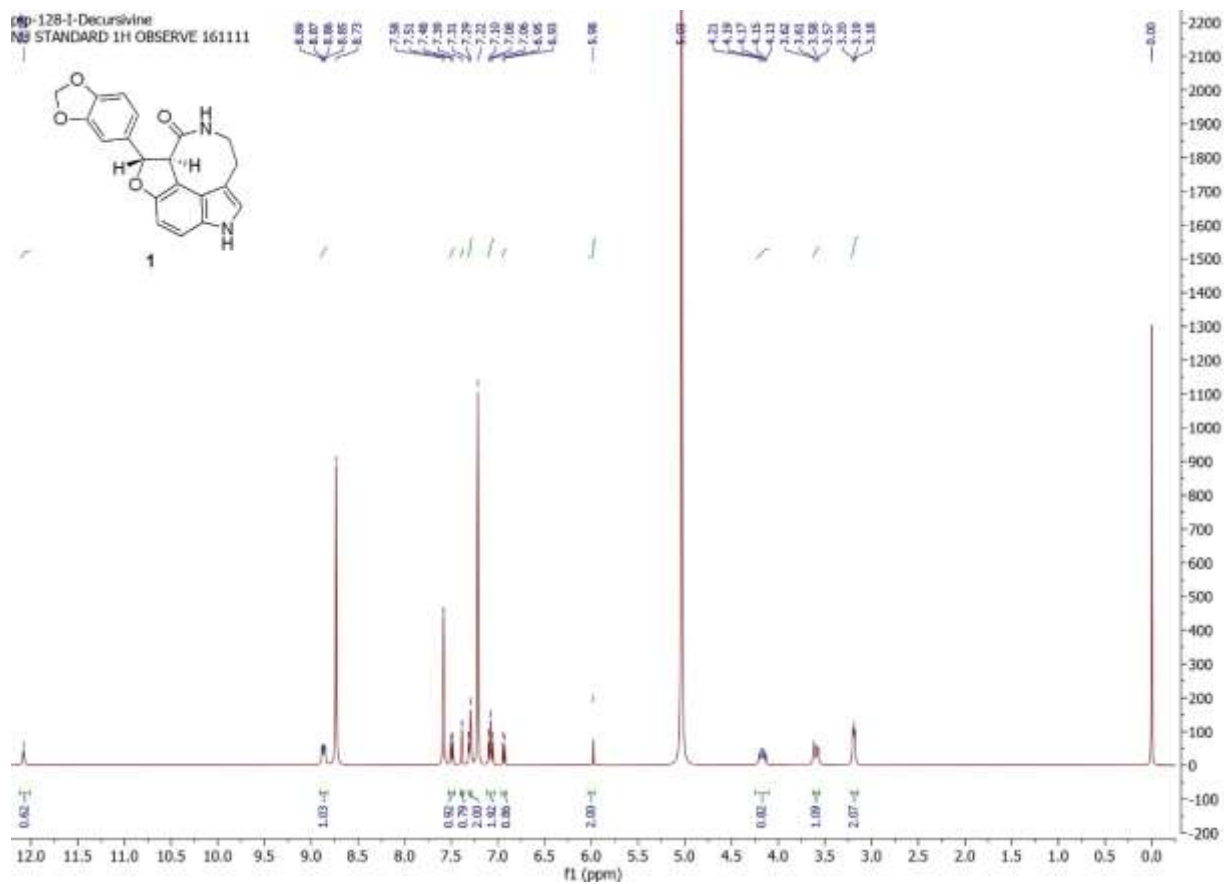

Figure S9: <sup>1</sup>H NMR spectrum of Compound 1.

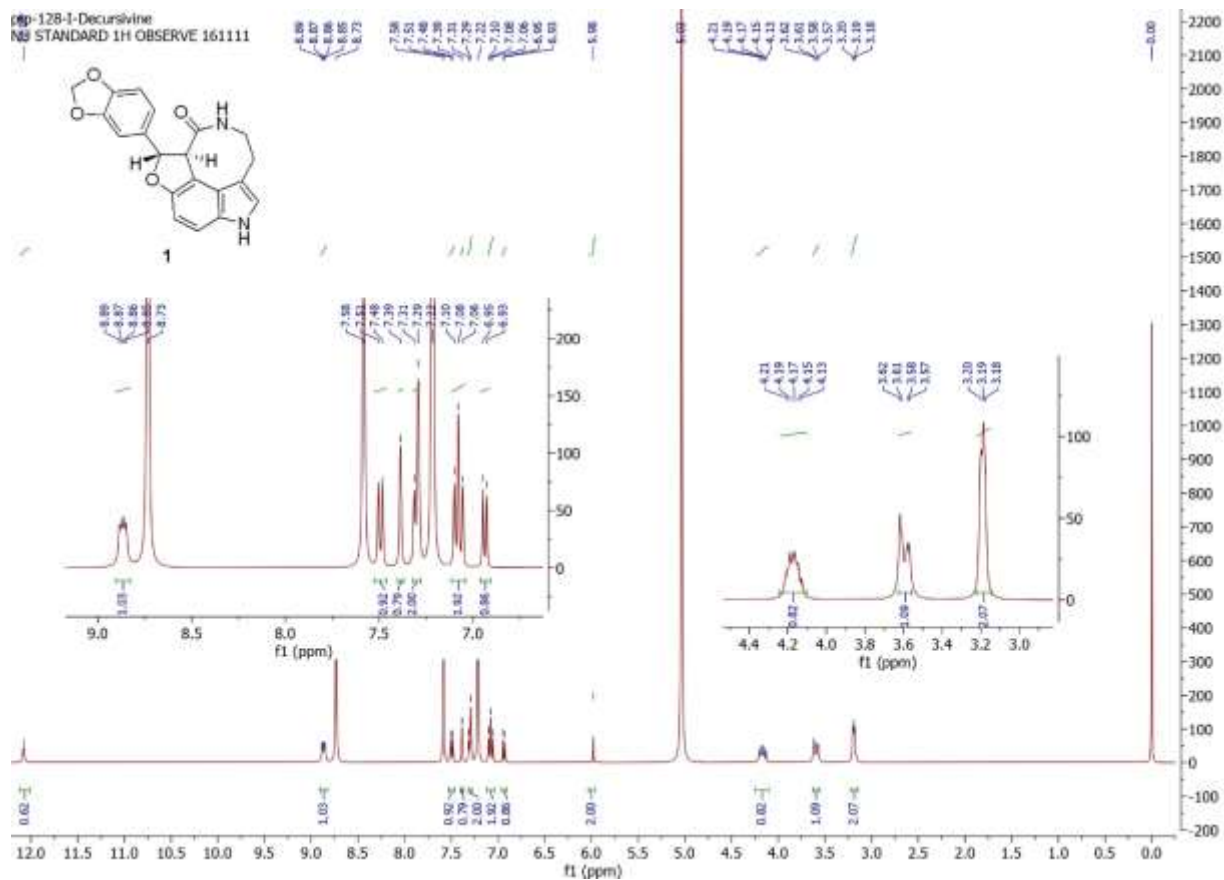

Figure S10:  $^1\text{H}$  NMR spectrum of Compound 1 with expanded regions.

### HPLC Analysis of Compound 1:

Lux 5 $\mu$ m Cellulose-4 chiral column, eluent: H<sub>2</sub>O/MeOH (90/10  $\rightarrow$  10/90 over 15 min), flow rate: 1 mL/min, 25  $^{\circ}$ C,  $\lambda$  = 280 nm. Compound 1 is racemic containing a pair of enantiomers, t = 8.11 min (one enantiomer) and t = 10.91 min (other enantiomer).

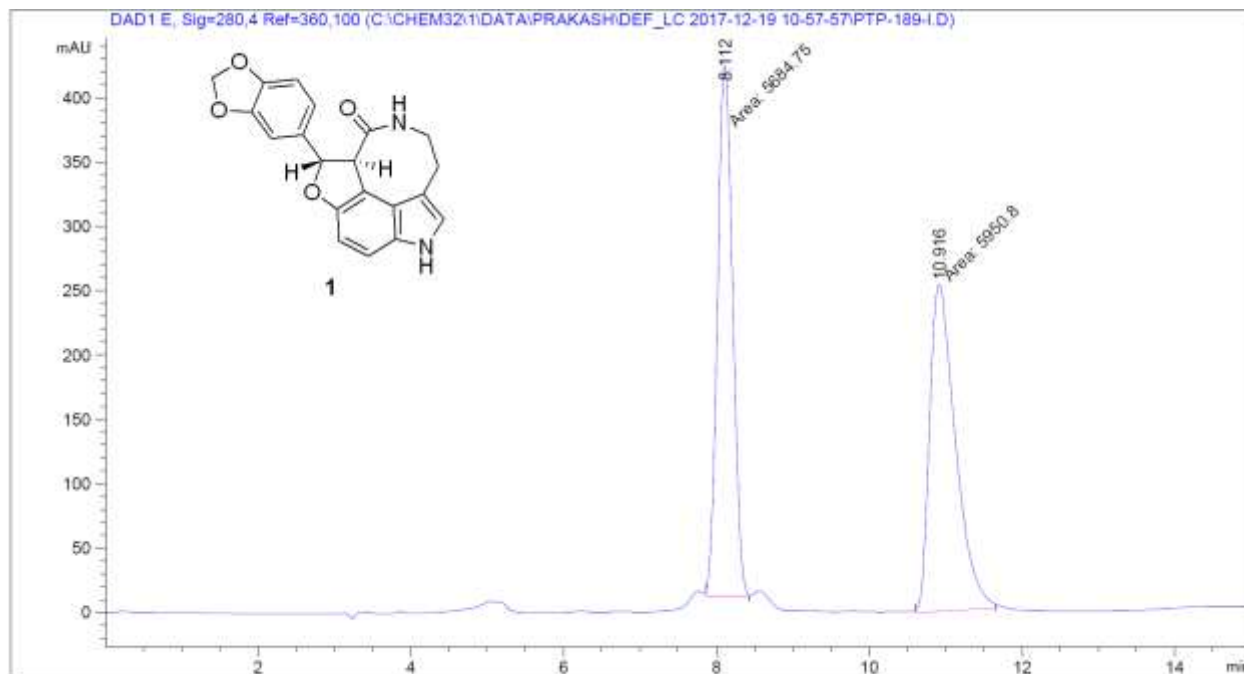

Figure S11: HPLC spectrum of Compound 1.
